# Supplementary material for: Personality differentially affects individual mate choice decisions in female and male Western mosquitofish (Gambusia affinis)
Source: PLoS One. 2018 May 15;13(5):e0197197. doi: 10.1371/journal.pone.0197197 (PMC5953439; doi:10.1371/journal.pone.0197197)
Supplement: S1 File — (XLSX) [file pone.0197197.s003.xlsx]

## Sheet: Sheet1
					Personality assessment 1			Personality assessment 2			Mean value of personality assessment			Mate choice tests for large-bodied mating partner								Mate choice tests for more active mating partner
Batch #	Bottle #	Fish ID	Sex	SL [mm]	Emergence [s]	Activity [sq]	Shoaling [s]	Emergence [s]	Activity [sq]	Shoaling [s]	Emergence [s]	Activity [sq]	Shoaling [s]	Animation #	t large 1. part [s]	t small 1. part [s]	t large 2. part [s]	t small 2. part [s]	Tsum. large [s]	Tsum. small [s]	SOP	Animation #	t fast 1. part [s]	t slow 1. part [s]	t fast 2. part [s]	t slow 2. part [s]	Tsum. fast [s]	Tsum. slow [s]	SOP	NOTE
1	1	F1	female	36	74	183	270	2	180	297	38	181.5	283.5	M14	50	18	127	13	177	31	0.701923	M24	87	44	50	88	137	132	0.0185874
	2	F2	female	33	10	365	255	6	340	295	8	352.5	275	M12	234	0	47	56	281	56	0.667656	M4	239	7	0	297	239	304	-0.119705
	3	F3	female	39	12	221	275	1	227	291	6.5	224	283	M8	41	72	182	11	223	83	0.457516	M16	70	59	40	56	110	115	-0.0222222
	4	F4	female	24	2	193	285	47	202	258	24.5	197.5	271.5	M19	56	97	209	17	265	114	0.398417	M20	112	71	52	171	164	242	-0.192118
	5	F5	female	31	0	210	279	0	176	293	0	193	286	M15	38	99	96	38	134	137	-0.0110701	M18	46	88	8	160	54	248	-0.642384
	6	F6	female	25	17	170	290	0	176	298	8.5	173	294	M13	103	47	195	9	298	56	0.683616	M10	33	122	199	28	232	150	0.21466
	7	F7	female	36	77	110	263	21	56	244	49	83	253.5	M2	19	195	25	212	44	407	-0.804878	M13	28	157	57	188	85	345	-0.604651
	8	F8	female	37	14	141	202	6	157	192	10	149	197	M10	68	120	83	78	151	198	-0.13467	M17	37	123	33	83	70	206	-0.492754
	9	F9	female	30	0	178	297	10	219	294	5	198.5	295.5	M6	75	30	69	27	144	57	0.432836	M11	89	69	127	86	216	155	0.16442
	10	F10	female	28	19	211	262	2	278	282	10.5	244.5	272	M18	101	112	87	42	188	154	0.0994152	M2	10	156	101	52	111	208	-0.304075
	11	F11	female	29	34	89	0	16	139	288	25	114	144	M23	210	43	65	110	275	153	0.285047	M3	54	60	12	51	66	111	-0.254237
	12	F12	female	29	29	194	255	101	192	220	65	193	237.5	M22	264	0	0	299	264	299	-0.062167	M5	224	60	0	73	224	133	0.254902
	13	F13	female	24	64	191	184	15	252	264	39.5	221.5	224	M16	172	23	137	122	309	145	0.361233	M6	93	42	20	150	113	192	-0.259016
	14	F14	female	31	87	153	270	44	151	273	65.5	152	271.5	M21	101	90	246	0	347	90	0.588101	M7	0	218	110	8	110	226	-0.345238
2	1	F15	female	29	17	104	285	0	119	290	8.5	111.5	287.5	M3	76	71	31	157	107	228	-0.361194	M6	36	85	61	127	97	212	-0.372168
	2	F16	female	29	46	126	253	46	130	223	46	128	238	M2	23	189	110	39	133	228	-0.263158	M18	65	90	151	43	216	133	0.237822
	3	F17	female	27	249	57	252	190	85	271	219.5	71	261.5	M5	146	0	67	33	213	33	0.731707	M16	34	51	62	41	96	92	0.0212766
	4	F18	female	30	18	74	226	71	156	277	44.5	115	251.5	M9	14	156	48	132	62	288	-0.645714	M24	24	110	67	76	91	186	-0.34296
	5	F19	female	30	23	71	266	33	100	284	28	85.5	275	M22	92	121	33	4	125	125	0	M7	97	128	33	179	130	307	-0.405034
	6	F20	female	29	87	78	255	229	36	287	158	57	271	M16	74	66	30	115	104	181	-0.270175	M9	139	26	228	0	367	26	0.867684
	7	F21	female	29	73	67	206	42	106	289	57.5	86.5	247.5	M21	25	76	111	0	136	76	0.283019	M21	0	213	155	30	155	243	-0.221106
	8	F22	female	28	78	99	148	24	204	0	51	151.5	74	M15	122	32	84	92	206	124	0.248485	M2	144	58	122	41	266	99	0.457534
	9	F23	female	23	42	148	291	20	79	286	31	113.5	288.5	M19	56	160	204	13	260	173	0.200924	M8	28	189	219	18	247	207	0.0881057
	10	F24	female	23	21	202	295	9	156	290	15	179	292.5	M1	56	78	23	147	79	225	-0.480263	M3	74	96	62	101	136	197	-0.183183
	11	F25	female	24	8	198	69	10	142	292	9	170	180.5	M6	86	74	102	70	188	144	0.13253	M12	43	165	168	20	211	185	0.0656566
	12	F26	female	28	16	78	296	65	109	295	40.5	93.5	295.5	M11	114	45	176	30	290	75	0.589041	M14	185	30	65	180	250	210	0.0869565
	13	F27	female	25	25	105	292	17	211	285	21	158	288.5	M12	141	50	155	96	296	146	0.339367	M5	188	23	107	44	295	67	0.629834
	14	F28	female	27	31	157	294	4	190	278	17.5	173.5	286	M10	149	62	103	24	252	86	0.491124	M23	160	36	125	22	285	58	0.661808
3	1	F29	female	38	13	154	169	93	115	275	53	134.5	222	M15	73	73	65	64	138	137	0.00363636	M9	105	41	22	217	127	258	-0.34026
	2	F30	female	43	25	129	298	41	99	194	33	114	246	M21	21	76	43	63	64	139	-0.369458	M22	76	24	69	34	145	58	0.428571
	3	F31	female	29	25	169	219	48	102	253	36.5	135.5	236	M8	97	58	130	45	227	103	0.375758	M4	138	33	31	76	169	109	0.215827
	4	F32	female	36	12	96	247	30	87	266	21	91.5	256.5	M7	118	41	168	6	286	47	0.717718	M11	86	68	67	45	153	113	0.150376
	5	F33	femalee	missing	17	108	279	21	130	247	19	119	263																	fast-start and flight responses continued; excluded from analysis of mating preferences
	6	F34	female	28	43	291	298	36	183	290	39.5	237	294	M20	116	25	35	69	151	94	0.232653	M19	9	216	7	155	16	371	-0.917313
	7	F35	female	26	124	62	292	119	115	244	121.5	88.5	268	M22	106	91	103	76	209	167	0.111702	M23	128	0	54	88	182	88	0.348148
	8	F36	female	29	41	162	279	181	103	16	111	132.5	147.5	M18	15	0	0	0	15	0	1	M1	0	60	63	0	63	60	0.0243902
	9	F37	female	25	21	174	275	25	56	10	23	115	142.5	M19	189	50	17	219	206	269	-0.132632	M18	69	86	0	39	69	125	-0.28866
	10	F38	female	34	28	233	275	51	181	293	39.5	207	284																	size preference was tested twice by mistake; excluded from analysis of mating preferences
	11	F39	female	38	5	248	290	62	251	298	33.5	249.5	294	M9	121	53	84	72	205	125	0.242424	M16	169	14	102	99	271	113	0.411458
	12	F40	female	24	39	240	266	22	182	156	30.5	211	211	M24	117	41	64	62	181	103	0.274648	M3	104	69	104	59	208	128	0.238095
	13	F41	female	30	13	226	290	0	178	291	6.5	202	290.5	M2	74	95	47	65	121	160	-0.13879	M6	31	161	120	64	151	225	-0.196809
	14	F42	female	31	0	426	296	0	438	270	0	432	283	M14	177	6	58	65	235	71	0.535948	M2	138	41	117	56	255	97	0.448864
					Personality assessment 1			Personality assessment 2			Mean value of personality assessment			Mate choice tests for large-bodied mating partner								Mate choice tests for more active mating partner
Batch #	Bottle #	Fish ID	Sex	SL [mm]	Emergence [s]	Activity [sq]	Shoaling [s]	Emergence [s]	Activity [sq]	Shoaling [s]	Emergence [s]	Activity [sq]	Shoaling [s]	Animation #	t large 1. part [s]	t small 1. part [s]	t large 2. part [s]	t small 2. part [s]	Tsum. large [s]	Tsum. small [s]	SOP	Animation #	t fast 1. part [s]	t slow 1. part [s]	t fast 2. part [s]	t slow 2. part [s]	Tsum. fast [s]	Tsum. slow [s]	SOP
4	1	M1	male	24	55	221	168	17	204	267	36	212.5	217.5	F19	84	117	197	7	281	124	0.387654	F18	28	124	177	65	205	189	0.0406091
	2	M2	male	25	48	154	242	35	127	208	41.5	140.5	225	F18	73	66	72	54	145	120	0.0943396	F3	49	91	31	88	80	179	-0.382239
	3	M3	male	22	75	177	268	14	150	292	44.5	163.5	280	F1	103	59	94	77	197	136	0.183183	F16	58	86	212	7	270	93	0.487603
	4	M4	male	24	0	159	276	15	164	256	7.5	161.5	266	F21	171	17	87	76	258	93	0.470085	F4	110	96	88	48	198	144	0.157895
	5	M5	male	21	26	119	288	18	114	281	22	116.5	284.5	F24	41	81	84	48	125	129	-0.015748	F1	51	122	64	94	115	216	-0.305136
	6	M6	male	22	20	175	278	10	138	0	15	156.5	139	F14	0	93	17	60	17	153	-0.8	F20	68	67	36	32	104	99	0.0246305
	7	M7	male	23	137	108	160	300	71	21	218.5	89.5	90.5	F8	0	51	148	12	148	63	0.402844	F24	47	0	59	20	106	20	0.68254
	8	M8	male	22	24	220	269	22	183	290	23	201.5	279.5	F4	82	90	78	84	160	174	-0.0419162	F17	89	57	41	165	130	222	-0.261364
	9	M9	male	24	5	145	298	11	150	295	8	147.5	296.5	F11	65	53	45	58	110	111	-0.00452489	F10	58	202	295	0	353	202	0.272072
	10	M10	male	24	235	203	282	148	134	281	191.5	168.5	281.5	F13	60	59	115	38	175	97	0.286765	F9	0	27	44	31	44	58	-0.137255
	11	M11	male	21	253	53	142	32	108	234	142.5	80.5	188	F5	86	56	131	50	217	106	0.343653	F6	152	24	112	125	264	149	0.27845
	12	M12	male	23	300	62	102	148	94	99	224	78	100.5	F6	82	59	10	181	92	240	-0.445783	F7	62	71	11	65	73	136	-0.301435
	13	M13	male	18	21	120	208	30	217	40	25.5	168.5	124	F15	192	15	9	258	201	273	-0.151899	F2	66	67	55	123	121	190	-0.221865
	14	M14	male	24	33	117	297	7	152	297	20	134.5	297	F9	100	97	32	212	132	309	-0.401361	F5	54	146	176	15	230	161	0.176471
5	1	M15	male	29	19	213	220	21	156	240	20	184.5	230	F1	71	53	110	39	181	92	0.326007	F23	67	79	44	102	111	181	-0.239726
	2	M16	male	20	0	144	242	34	186	285	17	165	263.5	F5	58	36	57	95	115	131	-0.0650407	F15	47	76	57	96	104	172	-0.246377
	3	M17	male	26	12	147	285	19	160	282	15.5	153.5	283.5	F19	0	27	11	89	11	116	-0.826772	F10	91	26	128	16	219	42	0.678161
	4	M18	male	22	21	102	258	28	115	274	24.5	108.5	266	F18	212	32	0	223	212	255	-0.0920771	F2	284	0	0	286	284	286	-0.00350877
	5	M19	male	26	0	159	257	28	138	290	14	148.5	273.5	F4	89	79	152	65	241	144	0.251948	F6	73	90	123	56	196	146	0.146199
	6	M20	male	23	51	168	148	45	180	208	48	174	178	F2	70	92	73	141	143	233	-0.239362	F14	155	27	38	138	193	165	0.0782123
	7	M21	male	20	110	135	165	43	97	164	76.5	116	164.5	F23	56	42	48	63	104	105	-0.00478469	F12	65	60	78	116	143	176	-0.103448
	8	M22	male	22	51	168	247	38	127	249	44.5	147.5	248	F12	41	125	223	41	264	166	0.227907	F19	47	170	81	166	128	336	-0.448276
	9	M23	male	27	69	117	234	63	125	225	66	121	229.5	F14	83	101	37	144	120	245	-0.342466	F22	92	60	135	103	227	163	0.164103
	10	M24	male	23	109	111	105	93	51	190	101	81	147.5	F17	130	42	108	75	238	117	0.340845	F18	73	80	93	90	166	170	-0.0119048
	11	M25	male	25	20	144	278	0	158	265	10	151	271.5	F16	50	140	110	57	160	197	-0.103641	F21	77	103	147	42	224	145	0.214092
	12	M26	male	24	38	105	275	25	184	272	31.5	144.5	273.5	F7	79	101	97	42	176	143	0.103448	F1	82	90	126	42	208	132	0.223529
	13	M27	male	23	61	67	249	0	167	192	30.5	117	220.5	F9	157	55	152	26	309	81	0.584615	F24	74	72	47	122	121	194	-0.231746
	14	M28	male	25	46	111	269	15	108	279	30.5	109.5	274	F20	64	94	48	112	112	206	-0.295597	F3	119	26	94	19	213	45	0.651163
6	1	M29	male	31	30	176	158	31	148	125	30.5	162	141.5	F12	106	65	99	16	205	81	0.433566	F7	28	137	56	44	84	181	-0.366038
	2	M30	male	33	148	153	288	253	167	280	200.5	160	284	F14	51	150	11	58	62	208	-0.540741	F8	120	35	72	146	192	181	0.0294906
	3	M31	male	25	16	177	276	21	149	294	18.5	163	285	F11	2	148	60	76	62	224	-0.566434	F12	18	102	191	4	209	106	0.326984
	4	M32	male	21	55	187	251	30	164	278	42.5	175.5	264.5	F24	202	18	11	243	213	261	-0.101266	F13	93	97	68	98	161	195	-0.0955056
	5	M33	male	22	27	159	293	4	161	285	15.5	160	289	F20	110	15	66	68	176	83	0.359073	F11	262	10	9	192	271	202	0.145877
	6	M34	male	27	22	163	166	11	145	136	16.5	154	151	F18	196	25	26	203	222	228	-0.0133333	F3	251	33	57	148	308	181	0.259714
	7	M35	male	23	61	155	17	13	152	5	37	153.5	11	F22	61	83	160	94	221	177	0.110553	F2	32	124	247	17	279	141	0.328571
	8	M36	male	23	23	191	268	63	84	279	43	137.5	273.5	F1	44	69	59	76	103	145	-0.169355	F15	120	33	151	34	271	67	0.60355
	9	M37	male	20	18	159	252	45	168	219	31.5	163.5	235.5	F6	29	144	186	57	215	201	0.0336538	F24	239	0	68	174	307	174	0.276507
	10	M38	male	23	16	328	41	9	255	33	12.5	291.5	37	F17	181	25	62	99	243	124	0.324251	F14	55	85	0	146	55	231	-0.615385
	11	M39	male	21	15	184	284	19	188	279	17	186	281.5	F15	102	47	139	15	241	62	0.590759	F16	114	95	171	37	285	132	0.366906
	12	M40	male	21	14	139	277	34	190	239	24	164.5	258	F13	175	1	14	169	189	170	0.0529248	F22	42	143	101	85	143	228	-0.229111
	13	M41	male	18	115	207	237	35	184	186	75	195.5	211.5	F7	267	0	68	125	335	125	0.456522	F21	147	49	17	181	164	230	-0.167513
	14	M42	male	26	8	115	285	13	128	273	10.5	121.5	279	F10	131	52	32	105	163	157	0.01875	F1	86	79	171	0	257	79	0.529762
